# Supplementary material for: A facile water-stable MOF-based “off–on” fluorescent switch for label-free detection of dopamine in biological fluid
Source: Royal Society of Chemistry journal article supplement (doi:10.1039/c7tb00099e), 2017-01-01
Supplement: c7tb00099e1.pdf [file c7tb00099e1.pdf]

## Supplementary Information

### **A facile water-stable MOF-based “off-on” fluorescent switch for label-free detection of dopamine in biological fluid**

Yue Cheng, Jie Wu, Chao Guo, Xin-Ge Li, Bin Ding\* and Yan Li\*

*Key Laboratory of Inorganic-Organic Hybrid Functional Materials Chemistry  
(Tianjin Normal University), Tianjin Key Laboratory of Structure and Performance  
for Functional Molecule, College of Chemistry, Tianjin Normal University, Tianjin,  
300387, P.R. China.*

\* E-mail: nkliyan398@gmail.com (Y. Li); qsdningbin@hotmail.com (B. Ding)

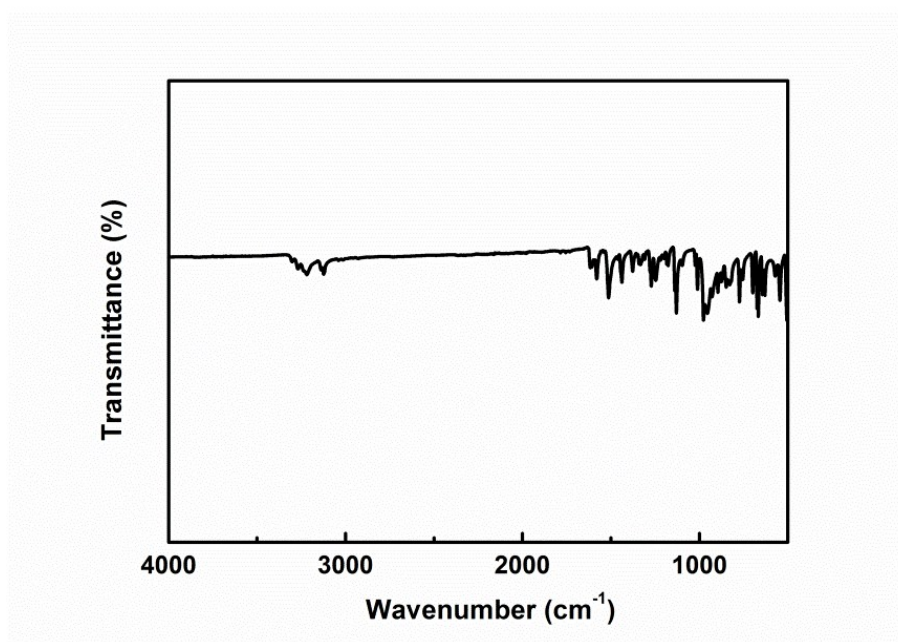

**Fig. S1** Fourier transform infrared (FT-IR) spectra of Abtz-CdI<sub>2</sub>-MOF.

As shown in Figure S1, the bands around ca. 3124 cm<sup>-1</sup> and bands in the 1100-1300 cm<sup>-1</sup> range can be related to  $\nu(\text{C-H})$  and  $\nu(\text{C-N})$  or  $\nu(\text{N-N})$  of triazole moieties. The triazole out of plane ring absorption also can be observed at around 630 cm<sup>-1</sup>.<sup>1-5</sup>

**X-ray crystallography.** Diffraction intensities for complex Abtz-CdI<sub>2</sub>-MOF were collected on a Bruker SMART 1000 CCD diffractometer with graphite-monochromated Mo-K $\alpha$  radiation ( $\lambda = 0.71073 \text{ \AA}$ ) by using the  $\omega$ - $\phi$  scan technique. Lorentz polarization and absorption corrections were applied. The structures were solved by direct methods and refined with the full-matrix least-squares technique using the SHELXS-97 and SHELXL-97 programs. Anisotropic thermal parameters were assigned to all non-hydrogen atoms. The organic hydrogen atoms were generated geometrically; the hydrogen atoms of the water molecules were located from difference maps and refined with isotropic temperature factors. Analytical expressions of neutral-atom scattering factors were employed, and anomalous dispersion corrections were incorporated. The crystallographic data and details of refinements for Abtz-CdI<sub>2</sub>-MOF are summarized in Table S1, selected bond lengths and angles are listed in Table S2. CCDC-1031671 (Abtz-CdI<sub>2</sub>-MOF) contains the supplementary crystallographic data for this paper. These data can be obtained free of charge from The Cambridge Crystallographic Data Centre via [www.ccdc.cam.ac.uk/data\\_request/cif](http://www.ccdc.cam.ac.uk/data_request/cif).

**Table S1** Crystallographic data and details of refinements for complex Abtz-CdI<sub>2</sub>-MOF <sup>a,b</sup>

| <b>Abtz-CdI<sub>2</sub>-MOF</b>              |                                                                 |
|----------------------------------------------|-----------------------------------------------------------------|
| Formula                                      | C <sub>18</sub> H <sub>20</sub> CdI <sub>2</sub> N <sub>8</sub> |
| <i>M</i> (g mol <sup>-1</sup> )              | 714.62                                                          |
| crystal system                               | Orthorhombic                                                    |
| space group                                  | <i>Pbca</i>                                                     |
| <i>a</i> (Å)                                 | 14.468(4)                                                       |
| <i>b</i> (Å)                                 | 13.931(4)                                                       |
| <i>c</i> (Å)                                 | 22.740(7)                                                       |
| $\alpha$ (°)                                 | 90                                                              |
| $\beta$ (°)                                  | 90                                                              |
| $\gamma$ (°)                                 | 90                                                              |
| <i>V</i> (Å <sup>3</sup> )                   | 4583(2)                                                         |
| <i>Z</i>                                     | 8                                                               |
| <i>F</i> (000)                               | 2704                                                            |
| $\rho_{\text{calc}}$ (Mg m <sup>-3</sup> )   | 2.071                                                           |
| $\mu$ (mm <sup>-1</sup> )                    | 3.668                                                           |
| data/restraints/params                       | 4039 / 0 / 263                                                  |
| GOF on <i>F</i> <sup>2</sup>                 | 1.070                                                           |
| <i>R</i> <sub>1</sub> <sup>a</sup> (I=2σ(I)) | 0.0177                                                          |
| $\omega R_2^a$ (all data)                    | 0.0368                                                          |

$$^a R_1 = \Sigma ||F_o| - |F_c|| / \Sigma |F_o|. \quad ^b \omega R_2 = [\Sigma w(|F_o|^2 - |F_c|^2)^2 / \Sigma w|F_o|^2]^{1/2}.$$

**Table S2** Selected bond lengths /Å and bond angles /° for Abtz-CdI<sub>2</sub>-MOF

---

|                  |            |                  |            |
|------------------|------------|------------------|------------|
| Cd(1)-N(7)       | 2.360(2)   | Cd(1)-N(3)       | 2.370(2)   |
| Cd(1)-N(4)       | 2.402(2)   | Cd(1)-N(8)       | 2.415(2)   |
| N(7)-Cd(1) -N(3) | 153.55(15) | N(7)-Cd(1) -N(4) | 96.16(11)  |
| N(3)-Cd(1) -N(4) | 96.85(10)  | N(7)-Cd(1) -N(8) | 103.99(11) |
| N(3)-Cd(1) -N(8) | 97.44(10)  | N(4)-Cd(1) -N(8) | 95.985(16) |
| N(3)-Cd(1) -N(8) | 97.44(10)  | N(4)-Cd(1) -N(8) | 95.985(16) |

---

**Table S3** Analytical figures of merit for the detection of DA

| Content                        | Value                       |
|--------------------------------|-----------------------------|
| LOD (nM)                       | 57                          |
| Linear range ( $\mu\text{M}$ ) | 0.25-50                     |
| Calibration function           | $\Delta I = 4.951C - 5.314$ |
| Correlation coefficient $R^2$  | 0.995                       |
| RSD (n = 3) (%)                | 1.4                         |

## References

- 1 J. M. Hao, B. Y. Yu, K. V. Hecke and G. H. Cui, *CrystEngComm.*, 2015, **17**, 2279-2293.
- 2 G. H. Cui, C. H. He, C. H. Jiao, J. C. Geng and V. A. Blatov, *CrystEngComm.*, 2012, **14**, 4210-4216.
- 3 X. X. Wang, B. Y. Yu, K. V. Hecke and G. H. Cui, *Rsc Adv.*, 2014, **4**, 61281-61289.
- 4 L. Qin, J. Zheng, S. L. Xiao, X. H. Zheng and G. H. Cui, *Inorg. Chem. Commun.*, 2013, **34**, 71-74.
- 5 B. Ding, C. Guo, S. X. Liu, Y. Cheng, X. X. Wu, X. M. Su, Y. Y. Liu and Y. Li, *Rsc Adv.*, 2016, **6**, 33888-33900.
